# De Novo Genome assembly of the Caucasian dwarf goby *Knipowitschia cf. caucasica*, a new alien Gobiidae invading the River Rhine

Alexandra Schoenle<sup>1</sup>, Nadège Guiglielmoni<sup>1</sup>, Tobias Mainz<sup>1</sup>, Carola Greve<sup>2,3</sup>, Alexander Ben Hamadou<sup>2,3</sup>, Lisa Heermann<sup>1,4</sup>, Jost Borchering<sup>1</sup> & Ann-Marie Waldvogel<sup>1</sup>

<sup>1</sup> Institute of Zoology, University of Cologne, Zùlpicher Str. 47b, 50674 Cologne, Germany

<sup>2</sup> LOEWE Center for Translational Biodiversity Genomics, Senckenberganlage 25, 60325 Frankfurt am Main, Germany

<sup>3</sup> Senckenberg Research Institute, Senckenberganlage 25, 60325 Frankfurt am Main, Germany

<sup>4</sup> Federal Agency for Nature Conservation, Konstantinstr. 110, 53179 Bonn, Germany

**Correspondence:** [a.schoenle@uni-koeln.de](mailto:a.schoenle@uni-koeln.de)

## Abstract

The Caucasian dwarf goby *Knipowitschia cf. caucasica* is a new invasive alien Gobiidae spreading in the Lower Rhine since 2019. Little is known about the invasion biology of the species and further investigations to reconstruct the invasion history are lacking genomic resources. We assembled a high-quality chromosome-scale reference genome of *Knipowitschia cf. caucasica* by combining PacBio, Omni-C and Illumina technologies. The size of the assembled genome is 956.58 Mb with a N50 scaffold length of 43 Mb, which includes 92.3 % complete vertebrate/Actinopterygii Benchmarking Universal Single-Copy Orthologs. 98.96 % of the assembly sequence was assigned to 23 chromosome-level scaffolds, with a GC-content of 42.83 %. Repetitive elements account for 53.08 % of the genome. The chromosome-level genome contained 49,622 transcripts with 42,926 multi-exons, of which 45,512 genes were functionally annotated. In summary, the high-quality genome assembly provides a fundamental basis to understand the adaptive advantage of the species.

**Keywords:** fish; reference genome; invasive alien species; goby

1  
2  
3  
4  
5  
6  
7  
8  
9  
10  
11  
12  
13  
14  
15

## Introduction

Starting in 1999, few years after the opening of the Rhine-Main-Danube-Channel, a continuous succession of four gobiid fish invasions has been documented in the River Rhine, particularly the Lower Reaches (Borcherding, Staas, et al., 2011). The fifth and most recent invasion of the Caucasian dwarf goby *Knipowitschia cf. caucasica* is exceeding the preceding goby invasions both in the rate of population growth and in competition with the resident fish community including native and invasive species (Borcherding, Aschemeier, et al., 2021, and unpublished data from catches in 2022). *Knipowitschia cf. caucasica* ranks to the highest trophic level in the ecological food chain of the aquatic habitat, feeding on zooplankton and small chironomid larvae from makrozoobenthos (Borcherding, Aschemeier, et al., 2021; Didenko et al., 2020). It is accordingly expected that the dwarf goby invasion will have a strong impact on the species community and all associated ecological processes of the River Rhine and associated water bodies. Since coordinated monitoring and management of fish communities is highly benefiting from the integration of genetic and genomic analyses (Deiner et al., 2017; Pont et al., 2023; Tsuji et al., 2022), there is an urgent need for genomic resources of the dwarf goby, with a high-quality reference genome as the fundamental basis for high-resolution analyses. Population genomic analyses will furthermore allow for the reconstruction of the invasion history of the species and help to identify routes of invasion (Jaspers et al., 2021) and processes of rapid adaptation to local conditions in the novel environment (Szűcs et al., 2017; Yin et al., 2021).

## Material and methods

### Samples, DNA and Sequencing

Two adult individuals of the Caucasian dwarf goby *Knipowitschia cf. caucasica* (Figure 1) have been sampled in the River Rhine back water channel Bislich-Vahnum (North-Rhine Westphalia, Germany) in summer 2021 (sampling permission 602/00038/21 from the ULB Kreis Wesel 25.03.2021). Due to their morphological distinctness, morphological identification was straightforward. Fish were narcotised with Tricaine Methanesulfonate (MS-222) and then transferred to liquid nitrogen and preserved at -80°C.

**Figure 1.** Photo of the sequenced goby species *Knipowitschia cf. caucasica* and sampling location (red dot) in Germany. Photo taken by Fabian Gräfe.

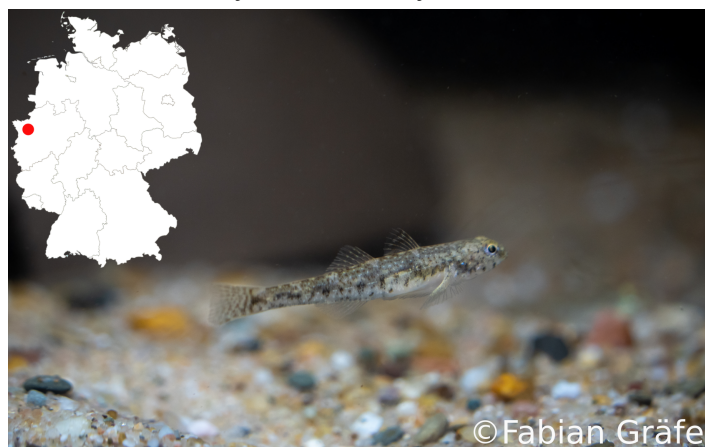

The genome of *Knipowitschia cf. caucasica* was sequenced by using a combination of PacBio Sequel II sequencing in CLR mode (Genome Technology Center (RGTC) at Radboudumc, Nijmegen, The Netherlands), Illumina NovaSeq 6000 sequencing with paired-end 150 bp (PE150) and Hi-C data obtained by Omni-C sequencing (Dovetail Genomics). High-molecular-weight (HMW) DNA used for PacBio and Illumina NovaSeq sequencing

was extracted from muscle tissue of one single individual following the phenol/chloroform extraction protocol (Sambrook and Russel, 2001). Hi-C library was constructed using the Dovetail® Omni-C® Kit (Dovetail Genomics) with a second individual (124.4 mg of muscle tissue as input material) and processed according to the Omni-C Proximity Ligation Assay protocol version 1.0. The concentration and purity of the DNA was assessed using a Nanodrop spectrophotometer and Qubit Fluorometer with the Qubit dsDNA High Sensitivity Assay kit. Fragment size distribution was evaluated by running the DNA sample on the TapeStation 2200 system to ensure that most DNA molecules were larger than 30 kb.

RNA was extracted from different tissues (gills, gonads, skin, liver, eyes, muscle) from one male individual by using the Quick-RNA MiniPrep plus Kit (Zymo Research, USA). Tissues were placed in tubes filled with 800 µl DNA/RNA shield and lysed via bead beating (speed 4 M/S, 1x30s and 1x10s). RNA extraction was done accordingly to the manufacturers protocol, with elution in 70 µl. The concentration and purity of the RNA was primarily assessed using a Nanodrop spectrophotometer and samples were pooled in the same concentration for a final sample. Quality of the sample was checked with Agilent 5400 bioanalyzer. A mRNA library with poly A enrichment was prepared and sequenced on a Illumina Novaseq machine to yield 50 millions pairs of 150-bp reads.

### Genome assembly and annotation

Illumina read quality was visualized with FastQC v0.11.9 (Andrews, 2010). Raw Illumina reads were trimmed for quality and adapters were removed using Trimmomatic v0.39 (Bolger et al., 2014) with options LEADING:3 TRAILING:3 SLIDINGWINDOW:4:20 MINLEN:50. PacBio long reads were converted into fastq files with samtools 1.13 (Danecek et al., 2021) and assembled with three genome assembly tools including Flye 2.9 with default parameter settings (Kolmogorov et al., 2019), wtdbg2 with -L set to 5000 recommended for PacBio reads (Ruan and Li, 2020) and Raven v1.7.0 with default parameters (Vaser and Šikić, 2021). All three assemblies were compared with SeqKit stats (Shen et al., 2016) and assembly-stats (Challis, 2017). Assembly size, contiguity, BUSCO completeness and *k*-mer completeness were further checked for the two best genome assemblies (flye and raven). Ortholog completeness was analysed by using BUSCO v5.5.2 (Manni et al., 2021) with actinopterygii\_odb10 (Creation date: 2021-02-19, number of genomes: 26, number of BUSCOs: 3640). *K*-mer completeness was analysed by using the tool KAT (Mapleson et al., 2016) and the KAT comp module. The best assembly with regards to assembly size, BUSCO completeness and *k*-mer completeness was used for further downstream analyses.

To obtain chromosome resolution of the assembly, we used Omni-C reads for Hi-C scaffolding of the contigs using instaGRAAL with parameters -l 5 -n 100 -c 1 -N 5 (Baudry et al., 2020). Automatic curation was done with instagraal-polish and using the -j parameter to indicate the number of N's to put in the gaps (-j NNNNNNNNNN). For further downstream analyses the instaGRAAL assembly file was filtered for contigs larger than 10 Mb with BBmap (BBtools 2013) to only use chromosome-level scaffolds. Gaps created during the scaffolding process were closed with PacBio data using TGS-GapCloser (Xu et al., 2020) with -tgstype pb without error correction (-ne). Gap-filled scaffolds were polished with HyPo (Kundu et al., 2019) by using mapped short (Illumina) and long reads (PacBio). The genome was analyzed using BlobToolKit 4.0.7 including BUSCO scores (Challis et al., 2020). A Hi-C map for the final assembly was produced using hicstuff (Matthey-Doret et al., 2020) for contact map. To assess the assembly metrics, the estimated assembly completeness was calculated with KAT (Mapleson et al., 2016). BUSCO completeness of the final genome was analysed by using BUSCO v5.4.7 (Manni et al., 2021).

Repetitive elements were identified *de novo* with RepeatModeler version 2.0.1. Repetitive DNA and softmasking was performed with RepeatMasker version 4.1.1 (Smit et al., 2013) using the repeat library previously identified via RepeatModeler and skipping the bacterial insertion element check (-no\_is) and run with rmbblastn version 2.10.0+ (Flynn et al., 2020). The masked genome assembly was used for structural annotation together with the Illumina short reads and the database vertebrata\_odb10 (Creation date: 2021-02-19, number of genomes: 67, number of BUSCOs: 3354) using the BRAKER3 pipeline (Gabriel et al., 2023).

For the functional annotation of the final genome assembly with InterProScan-5.59-91.0 (Jones et al., 2014) the needed sequencing data were uploaded to the Galaxy web platform provided by the Galaxy Community (2022), and we used the public server at usegalaxy.eu. The following parameters were set for the InterProScan run: `-dp -seqtype p -applications TIGRFAM, FunFam, SFLD, SUPERFAMILY, PANTHER, Gene3D, Hamap, PrositeProfiles, Coils, SMART, CDD, PRINTS, PIRSR, PrositePatterns, AntiFam, Pfam, MobiDBLite, PIRSF -pathways -goterms`.

Moreover, we extracted the mitochondrial genome from the assembly by using MitoHiFi 3.2 (Uliano-Silva et al., 2023) with MitoFinder (Allio et al., 2020).

## Results

The long-read assembler Flye (Kolmogorov et al., 2019) generated the best out of three obtained assemblies. This assembly consisted of 16,269 contigs (966 Mb total contig length). Contigs displayed high contiguity with an N50 length of 149.4 kb. The integrity was demonstrated by 90.52% BUSCO gene completeness (single 98.42%, duplicated 1.58%) using the *actinopterygii\_odb10* reference set.

**Figure 2. A.** Snailplot produced by Blobtoolkit2 showing assembly metrics, including scaffold statistics (top left), BUSCO completeness based on the *actinopterygii\_odb10* reference set (top right), and base composition (bottom right) shown by dark/light blue rings. The inner radial axis (gray) shows the length of each contig in descending order. Dark orange and light orange portions represent the N50 and N90 scaffold lengths, respectively. The genome has a total length of 957 Mb with a maximum contig length of 59.2 Mb (shown in red). Distribution of scaffold lengths is shown in dark grey with the plot radius scaled to the longest scaffold present in the assembly (59,227,272 bp, shown in red). Orange and pale-orange arcs show the N50 and N90 scaffold lengths (43,016,011 bp and 33,193,346 bp), respectively. **B.** BlobToolKit GC-coverage plot. Scaffolds are color-coded based on their phylum, while circles are scaled proportionally to scaffold length. Histograms depict the distribution of the total scaffold length along each axis.

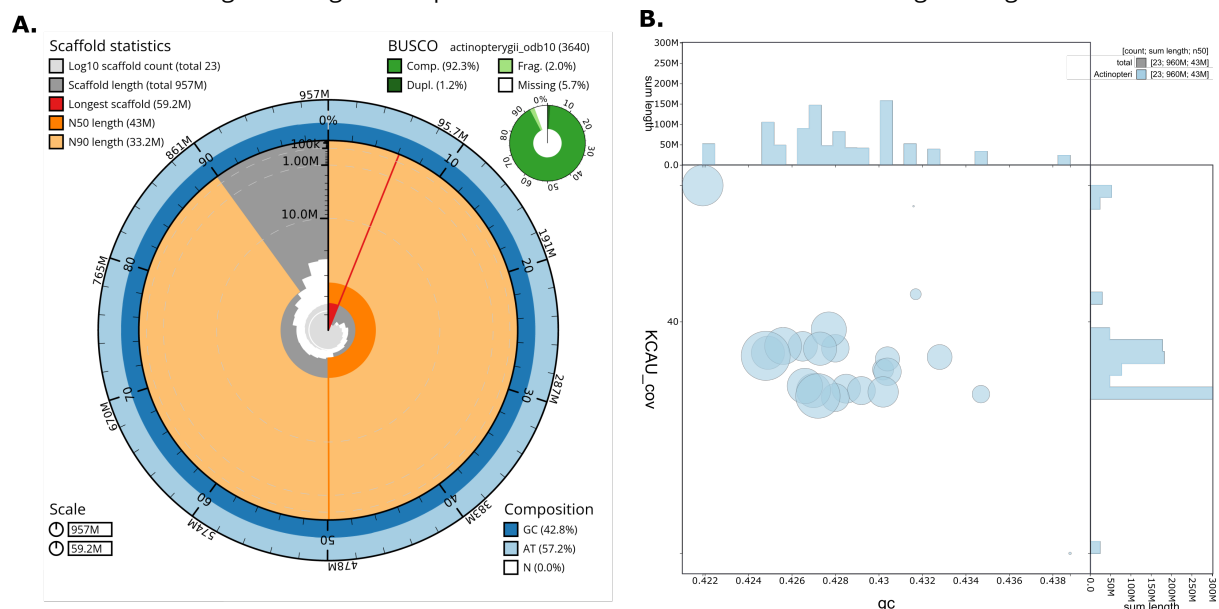

Contigs were scaffolded into 23 chromosome-scale scaffolds (956.6 Mb in length, 98.87% assembly length, 43 Mb scaffold N50 length) using the Hi-C data (Figure 2B). BUSCO scores (Manni et al., 2021) of the final genome assembly after gap-closing and polishing resulted in 92.3% gene completeness (single 98.72%, duplicated 1.28%) using the *actinopterygii\_odb10* reference set, 1.2% of the BUSCO genes appeared duplicated for

the assembly (Figure 2A).

Gene annotation predicted a total of 49,807 genes of which 185 genes were duplicated. The final genome revealed a total of 49,622 transcripts distributed across 42,541 loci, with 42,926 transcripts characterized as multi-exon, of which 45,512 transcripts were functionally annotated. BUSCO analysis recovered 85.1% BUSCO gene completeness (single 69.9%, duplicated 15.2%) using the vertebrata\_odb10 reference set. KAT analysis based on Illumina reads and the collapsed assembly showed two peaks of  $k$ -mer multiplicity; a heterozygous peak at 24X and a homozygous peak at 48X, with almost all  $k$ -mers represented exactly once in the homozygous peak of the assembly as expected. (Figure 3A). The estimated assembly completeness of the final assembly calculated with KAT was 96.64%. Chromosome-scale scaffolds were labeled by decreasing size. The remaining 1.03% unplaced sequences were smaller than 10,000 kb. The chromosome-level scaffolds showed relatively consistent contact patterns, representing well individualized entities in the contact map (Figure 3B).

The mitochondrial genome has also been assembled and is 16,377 bp in length.

**Figure 3. A.** KAT comparison of the  $k$ -mers in the Illumina dataset versus the final genome assembly. **B.** Hi-C contact map, with a binning of 3000 and normalization, for the final genome assembly. All 23 chromosomes are shown in order of size from left to right and top to bottom.

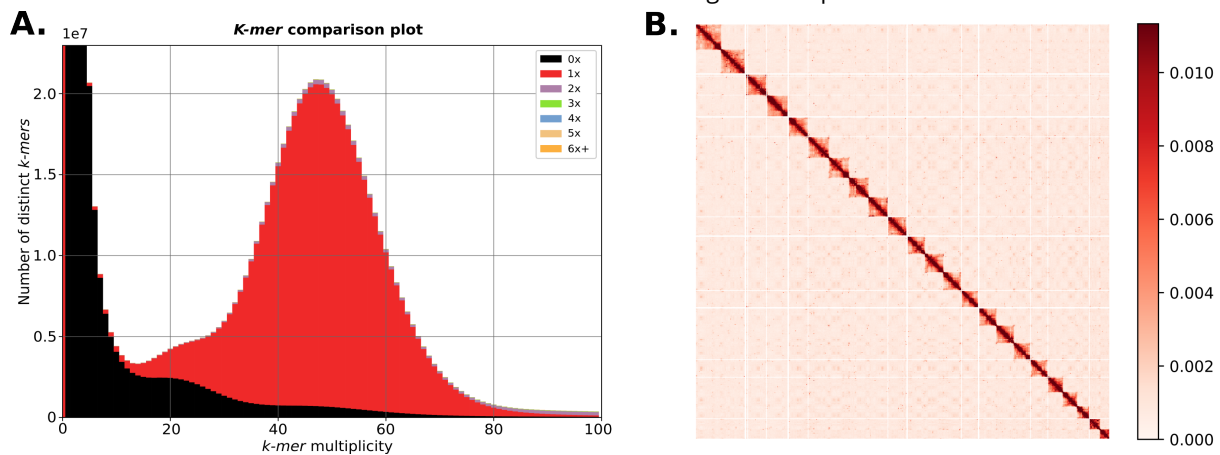

The repeat content was identified via RepeatModeler and resulted in a non-redundant library of 2,812 consensus sequences of repeat families (Supplement <https://doi.org/10.5281/zenodo.10784873>). These repeats accounted in total for 53.08% (507.8 Mb) of the assembled genome.

## Discussion

With the benefit of PacBio sequencing, genome assembly was performed with three different approaches, and we selected the most performant software (Flye) for contig construction. Here we present the complete genome sequence of the invasive Gobiidae species *Knipowitschia cf. caucasica*, generated using Illumina and PacBio platforms, to achieve an assembly of approximately 956.58 Mb (scaffold N50 of 43 Mb) and high contiguity with 49,622 transcripts (vertebrata) of which 45,512 transcripts were functionally annotated. In comparison, the benthic round goby *Neogobius melanostomus* genome is 1 Gb in size with a gene annotation prediction of 38,773 genes and 39,166 proteins reaching a BUSCO completeness of 86.9% (Actinopterygii) (Adrian-Kalchauer et al., 2020).

Studying population genomics and establishing reference genomes for invasive species plays a crucial role in advancing our comprehension of biological invasions and aids in the proactive detection and management of these invasive species. Despite a global increase in invasion rates, the field of "invasion genomics" is still

in its infancy. In a comprehensive review, it was noted that only 32% of species listed on the International Union for Conservation of Nature's "100 Worst Invasive Alien Species" have undergone studies utilizing population genomic data. Furthermore, for over 50% of the species on this list, a reference genome is yet to be established (Matheson and McGaughan, 2022). Therefore, the assembly of reference genomes for invasive species is imperative and essential to unravel the role of genome-driven processes in facilitating invasion, and making them publicly available serves as a crucial step.

## Acknowledgements

We thank the Genome Technology Center (RGTC) at Radboudumc for the use of the Sequencing Core Facility (Nijmegen, The Netherlands), which provided the PacBio SMRT sequencing service on the Sequel II platform. We acknowledge the Regional Computing Center of the University of Cologne (RRZK) for providing computing time on the DFG-funded [Funding number INST 216/512/1FUGG] High Performance Computing (HPC) system CHEOPS as well as support. We also thank the ULB Kreis Wesel for granting us permission to sample the fish at Bislich-Vahnum, North-Rhine-Westphalia, Germany.

## Fundings

AMW acknowledges funding of her Juniorprofessorship as part of the BMBF funded "Bund-Länder-Programm". This project is also part of the Biodiversity Genomics Center Cologne (BioC<sup>2</sup>) funded by the Excellence Research Support Programm of the University of Cologne.

## Conflict of interest disclosure

The authors declare that they comply with the PCI rule of having no financial conflicts of interest in relation to the content of the article.

## Data, script, code, and supplementary information availability

The genome sequence of *Knipowitschia* cf. *caucasica* (caucasian dwarf goby) is released openly for reuse. The *Knipowitschia* cf. *caucasica* genome sequencing is part of the LTER project REES (<https://deims.org/554de3a9-1ad9-46e9-9b70-f6e25a799876>). All raw sequence data and the assembly have been deposited at the European Nucleotide Archive (ENA) under Project accession number PRJEB58922: <https://identifiers.org/ena.embl/PRJEB58922>. The repeat library is deposited at Zenodo (<https://doi.org/10.5281/zenodo.10784873>)

## References

- Adrian-Kalchauer I, A Blomberg, T Larsson, Z Musilova, CR Peart, M Pippel, MH Solbakken, J Suurväli, JC Walsler, JY Wilson, M Alm Rosenblad, D Burguera, S Gutnik, N Michiels, M Töpel, K Pankov, S Schloissnig, and S Winkler (Dec. 2020). The round goby genome provides insights into mechanisms that may facilitate biological invasions. *BMC Biology* 18, 11. ISSN: 1741-7007. <https://doi.org/10.1186/s12915-019-0731-8>.
- Allio R, A Schomaker-Bastos, J Romiguier, F Prosdociami, B Nabholz, and F Delsuc (2020). MitoFinder: Efficient automated large-scale extraction of mitogenomic data in target enrichment phylogenomics. *Molecular Ecology Resources* 20, 892–905. ISSN: 1755-0998. <https://doi.org/10.1111/1755-0998.13160>.

- Andrews S (2010). *FastQC: a quality control tool for high throughput sequence data*. 179
- Baudry L, N Guiguelmoni, H Marie-Nelly, A Cormier, M Marbouty, K Avia, YL Mie, O Godfroy, L Sterck, JM Cock, 180  
C Zimmer, SM Coelho, and R Koszul (2020). instaGRAAL: chromosome-level quality scaffolding of genomes 181  
using a proximity ligation-based scaffold. *Genome Biology* 21, 148. ISSN: 1474-760X. <https://doi.org/10.1186/s13059-020-02041-z>. 182  
183
- BBtools* (2013). Joint Genome Institute. URL: <https://sourceforge.net/projects/bbmap/>. 184
- Bolger AM, M Lohse, and B Usadel (2014). Trimmomatic: a flexible trimmer for Illumina sequence data. *Bioinformatics* 30, 2114–2120. ISSN: 1460-2059, 1367-4803. <https://doi.org/10.1093/bioinformatics/btu170>. 185  
186
- Borcherding J, S Staas, S Krüger, M Ondračková, L Šlapanský, and P Jurajda (2011). Non-native Gobiid species 187  
in the lower River Rhine (Germany): recent range extensions and densities. *Journal of Applied Ichthyology* 188  
27, 153–155. ISSN: 1439-0426. <https://doi.org/10.1111/j.1439-0426.2010.01662.x>. 189
- Borcherding J, D Aschemeier, J Bruhy, L Heermann, J Lindner, SL Schröder, K Wagner, and S Staas (2021). The 190  
Caucasian dwarf goby, a new alien Gobiidae spreading at the Lower Rhine, Germany. *Journal of Applied* 191  
*Ichthyology* 37, 479–482. ISSN: 1439-0426. <https://doi.org/10.1111/jai.14196>. 192
- Challis R (2017). *rjchallis/assembly-stats 17.02*. Version 17.02. <https://doi.org/10.5281/zenodo.322347>. 193
- Challis R, E Richards, J Rajan, G Cochrane, and M Blaxter (2020). BlobToolKit – Interactive Quality Assessment 194  
of Genome Assemblies. *G3 (Bethesda)* 10, 1361–1374. <https://doi.org/10.1534/g3.119.400908>. 195
- Community TG (2022). The Galaxy platform for accessible, reproducible and collaborative biomedical analyses: 196  
2022 update. *Nucleic Acids Res.* 50, W345–W351. <https://doi.org/10.1093/nar/gkac247>. 197
- Danecek P, JK Bonfield, J Liddle, J Marshall, V Ohan, MO Pollard, A Whitwham, T Keane, SA McCarthy, RM 198  
Davies, and H Li (2021). Twelve years of SAMtools and BCFtools. *GigaScience* 10, giab008. ISSN: 2047-217X. 199  
<https://doi.org/10.1093/gigascience/giab008>. 200
- Deiner K, HM Bik, E Mächler, M Seymour, A Lacoursière-Roussel, F Altermatt, S Creer, I Bista, DM Lodge, N de 201  
Vere, ME Pfrender, and L Bernatchez (2017). Environmental DNA metabarcoding: Transforming how we 202  
survey animal and plant communities. *Molecular Ecology* 26, 5872–5895. ISSN: 1365-294X. <https://doi.org/10.1111/mec.14350>. 203  
204
- Didenko A, I Buzevych, Y Volikov, S Kruzhylina, and A Gurbyk (2020). Population dynamics and feeding ecology 205  
of the invasive Caucasian dwarf goby, *Knipowitschia caucasica*, in a freshwater habitat in Ukraine. *Knowledge* 206  
& *Management of Aquatic Ecosystems*, 26. ISSN: 1961-9502. <https://doi.org/10.1051/kmae/2020018>. 207
- Flynn JM, R Hubble, C Goubert, J Rosen, AG Clark, C Feschotte, and AF Smit (2020). RepeatModeler2 for auto- 208  
mated genomic discovery of transposable element families. *Proceedings of the National Academy of Sciences* 209  
117, 9451–9457. ISSN: 0027-8424, 1091-6490. <https://doi.org/10.1073/pnas.1921046117>. 210
- Gabriel L, T Brúna, KJ Hoff, M Ebel, A Lomsadze, M Borodovsky, and M Stanke (2023). BRAKER3: Fully Automated 211  
Genome Annotation Using RNA-Seq and Protein Evidence with GeneMark-ETP, AUGUSTUS and TSEBRA. 212  
*bioRxiv*. <https://doi.org/10.1101/2023.06.10.544449>. 213
- Jaspers C, M Ehrlich, JM Pujolar, S Künzel, T Bayer, MT Limborg, F Lombard, WE Browne, K Stefanova, and 214  
TBH Reusch (2021). Invasion genomics uncover contrasting scenarios of genetic diversity in a widespread 215  
marine invader. *PNAS* 118, e2116211118. <https://doi.org/10.1073/pnas.2116211118>. 216
- Jones P, D Binns, HY Chang, M Fraser, W Li, C McAnulla, H McWilliam, J Maslen, A Mitchell, G Nuka, S Pesseat, 217  
AF Quinn, A Sangrador-Vegas, M Scheremetjew, SY Yong, R Lopez, and S Hunter (2014). InterProScan 5: 218  
genome-scale protein function classification. *Bioinformatics* 30, 1236–1240. ISSN: 1367-4811, 1367-4803. 219  
<https://doi.org/10.1093/bioinformatics/btu031>. 220
- Kolmogorov M, J Yuan, Y Lin, and PA Pevzner (2019). Assembly of long, error-prone reads using repeat graphs. 221  
*Nature Biotechnology* 37, 540–546. ISSN: 1087-0156, 1546-1696. [https://doi.org/10.1038/s41587-019-0072-](https://doi.org/10.1038/s41587-019-0072-8) 222  
[8](https://doi.org/10.1038/s41587-019-0072-8). 223
- Kundu R, J Casey, and WK Sung (2019). HyPo: Super Fast & Accurate Polisher for Long Read Genome Assemblies. 224  
*bioRxiv*. <https://doi.org/10.1101/2019.12.19.882506>. eprint: [https://www.biorxiv.org/content/early/2019/](https://www.biorxiv.org/content/early/2019/12/20/2019.12.19.882506.full.pdf) 225  
[12/20/2019.12.19.882506.full.pdf](https://www.biorxiv.org/content/early/2019/12/20/2019.12.19.882506.full.pdf). 226

- Manni M, MR Berkeley, M Seppey, FA Simão, and EM Zdobnov (2021). BUSCO Update: Novel and Streamlined Workflows along with Broader and Deeper Phylogenetic Coverage for Scoring of Eukaryotic, Prokaryotic, and Viral Genomes. *Molecular Biology and Evolution* 38. Ed. by Kelley J, 4647–4654. ISSN: 1537-1719. <https://doi.org/10.1093/molbev/msab199>. 227  
228
- Mapleson D, G Garcia Accinelli, G Kettleborough, J Wright, and BJ Clavijo (2016). KAT: a K-mer analysis toolkit to quality control NGS datasets and genome assemblies. *Bioinformatics*, btw663. ISSN: 1367-4803, 1460-2059. <https://doi.org/10.1093/bioinformatics/btw663>. 231  
232  
233
- Matheson P and A McGaughran (2022). Genomic data is missing for many highly invasive species, restricting our preparedness for escalating incursion rates. *Scientific Reports* 12, 13987. ISSN: 2045-2322. <https://doi.org/10.1038/s41598-022-17937-y>. 234  
235  
236
- Matthey-Doret C, L Baudry, A Bignaud, A Cournac, R Montagne, N Guiguelmoni, T Foutel-Rodier, and VF Scolari (Oct. 2020). *hicstuff: Simple library/pipeline to generate and handle Hi-C data*. Version v2.3.1. <https://doi.org/10.5281/zenodo.4066351>. 237  
238  
239
- Pont D, P Meulenbroek, V Bammer, T Dejean, T Erős, P Jean, M Lenhardt, C Nagel, L Pekarik, M Schabuss, BC Stoeckle, E Stoica, H Zornig, A Weigand, and A Valentini (2023). Quantitative monitoring of diverse fish communities on a large scale combining eDNA metabarcoding and qPCR. *Molecular Ecology Resources* 23, 396–409. ISSN: 1755-0998. <https://doi.org/10.1111/1755-0998.13715>. 240  
241  
242  
243
- Ruan J and H Li (2020). Fast and accurate long-read assembly with wtdbg2. *Nature Methods* 17, 155–158. ISSN: 1548-7091, 1548-7105. <https://doi.org/10.1038/s41592-019-0669-3>. 244  
245
- Sambrook J and W Russel (2001). DNA isolation from mammalian tissue. In: *Molecular Cloning: A Laboratory Manual*. 3rd Edition. New York: Cold Spring Harbor Laboratory Press, pp. 623–627. 246  
247
- Shen W, S Le, Y Li, and F Hu (2016). SeqKit: A Cross-Platform and Ultrafast Toolkit for FASTA/Q File Manipulation. *PLOS ONE* 11. Ed. by Zou Q, e0163962. ISSN: 1932-6203. <https://doi.org/10.1371/journal.pone.0163962>. 248  
249
- Smit A, R Hubley, and P Green (2013). *RepeatMasker Open-4.0*. 250
- Szűcs M, ML Vahsen, BA Melbourne, C Hoover, C Weiss-Lehman, and RA Hufbauer (2017). Rapid adaptive evolution in novel environments acts as an architect of population range expansion. *Proceedings of the National Academy of Sciences* 114, 13501–13506. <https://doi.org/10.1073/pnas.1712934114>. 251  
252  
253
- Tsuji S, R Inui, R Nakao, S Miyazono, M Saito, T Kono, and Y Akamatsu (2022). Quantitative environmental DNA metabarcoding shows high potential as a novel approach to quantitatively assess fish community. *Scientific Reports* 12, 21524. ISSN: 2045-2322. <https://doi.org/10.1038/s41598-022-25274-3>. 254  
255  
256
- Uliano-Silva M, JGRN Ferreira, K Krasheninnikova, M Blaxter, N Mieszkowska, N Hall, P Holland, R Durbin, T Richards, P Kersey, P Hollingsworth, W Wilson, A Twyford, E Gaya, M Lawniczak, O Lewis, G Broad, F Martin, M Hart, I Barnes, G Formenti, L Abueg, J Torrance, EW Myers, R Durbin, M Blaxter, SA McCarthy, and Darwin Tree of Life Consortium (2023). MitoHiFi: a python pipeline for mitochondrial genome assembly from PacBio high fidelity reads. *BMC Bioinformatics* 24, 288. ISSN: 1471-2105. <https://doi.org/10.1186/s12859-023-05385-y>. 257  
258  
259  
260  
261  
262
- Vaser R and M Šikić (2021). Time- and memory-efficient genome assembly with Raven. *Nature Computational Science* 1, 332–336. ISSN: 2662-8457. <https://doi.org/10.1038/s43588-021-00073-4>. 263  
264
- Xu M, L Guo, S Gu, O Wang, R Zhang, BA Peters, G Fan, X Liu, X Xu, L Deng, and Y Zhang (2020). TGS-GapCloser: A fast and accurate gap closer for large genomes with low coverage of error-prone long reads. *GigaScience* 9, g1aa094. ISSN: 2047-217X. <https://doi.org/10.1093/gigascience/g1aa094>. 265  
266  
267
- Yin X, AS Martinez, MS Sepúlveda, and MR Christie (2021). Rapid genetic adaptation to recently colonized environments is driven by genes underlying life history traits. *BMC Genomics* 22, 269. ISSN: 1471-2164. <https://doi.org/10.1186/s12864-021-07553-x>. 268  
269  
270
